1  
2 **Tropomyosin and  $\alpha$ -actinin cooperation inhibits fimbrin association with actin**  
3 **filament networks in fission yeast**

4  
5 Jenna R. Christensen<sup>1</sup>, Kaitlin E. Homa<sup>1</sup>, Meghan E. O'Connell<sup>1</sup>, and David R. Kovar<sup>1,2</sup>

6  
7 <sup>1</sup>Department of Molecular Genetics and Cell Biology

8 <sup>2</sup>Department of Biochemistry and Molecular Biology

9 The University of Chicago, Chicago, IL 60637, USA

10  
11 Address correspondence to: David R. Kovar

12  
13 The University of Chicago

14 920 East 58<sup>th</sup> Street

15 CLSC Suite 915E

16 Chicago, IL 60637

17  
18 E-mail: [drkovar@uchicago.edu](mailto:drkovar@uchicago.edu)

19 Phone: 773-834-2810

20  
21 **ABSTRACT:**

22 We previously discovered that competition between fission yeast actin binding proteins  
23 (ABPs) for association with F-actin helps facilitate their sorting to different F-actin  
24 networks. Specifically, competition between endocytic actin patch ABPs fimbrin Fim1 and  
25 cofilin Adf1 enhances each other's activities, and also facilitates the rapid displacement  
26 of tropomyosin Cdc8 from the F-actin network. However, these interactions do not explain  
27 how Fim1, a robust competitor, is prevented from associating equally well with other F-  
28 actin networks. Here, with a combination of fission yeast genetics, live cell fluorescent  
29 imaging, and in vitro TIRF microscopy, we identified the contractile ring ABP  $\alpha$ -actinin  
30 Ain1 as a key sorting factor. Fim1 competes with Ain1 for association with F-actin, which  
31 is dependent upon their residence time on F-actin. Remarkably, although Fim1  
32 outcompetes both contractile ring ABPs Ain1 and Cdc8 individually, Cdc8 enhances the  
33 bundling activity of Ain1 10-fold, allowing the combination of Ain1 and Cdc8 to inhibit Fim1  
34 association with contractile ring F-actin.

35  
36 **INTRODUCTION**

37 Like other cell types, the unicellular fission yeast assembles diverse actin filament (F-  
38 actin) networks within a crowded common cytoplasm to facilitate different cellular  
39 functions such as cytokinesis (contractile ring), endocytosis (actin patches) and  
40 polarization (actin cables). Each of these F-actin networks possesses a unique  
41 overlapping set of actin binding proteins (ABPs) that regulate the network's formation,  
42 organization, and dynamics. However, the mechanisms by which different sets of ABPs  
43 sort to particular F-actin networks are less clear. We hypothesize that a combination of  
44 competitive and cooperative interactions between different ABPs for association with F-  
45 actin may be a driving force in establishing and maintaining their sorting. We previously  
46 identified competitive binding interactions between three ABPs with distinct network

47 localizations—fimbrin Fim1 and ADF/cofilin ADF1 (endocytic actin patches) and  
48 tropomyosin Cdc8 (cytokinesis contractile ring) (hereafter called Fim1, Adf1 and Cdc8)—  
49 that help facilitate their sorting to the proper F-actin networks in fission yeast (Skau and  
50 Kovar, 2010; Christensen *et al.*, 2017). Specifically, we discovered that synergistic  
51 activities between Fim1 and Adf1 rapidly displace Cdc8 from F-actin networks such as  
52 endocytic actin patches (Skau and Kovar, 2010; Christensen *et al.*, 2017). Although Fim1  
53 prevents Cdc8 from associating with endocytic actin patches, it is unclear how Fim1 is  
54 prevented from associating with other F-actin networks such as the contractile ring.  
55 Therefore, we sought to determine whether other ABPs at the contractile ring prevent  
56 Fim1 association. In this study, we demonstrate that Fim1 competes with the contractile  
57 ring ABP  $\alpha$ -actinin Ain1 (hereafter called Ain1) for association with F-actin, and that their  
58 ability to compete is defined by their residence time on F-actin. Additionally, we show that  
59 although Fim1 outcompetes both Cdc8 and Ain1 individually, Cdc8 enhances Ain1-  
60 mediated F-actin bundling ten-fold, allowing the combination of Cdc8 and Ain1 to compete  
61 with Fim1 for association with F-actin.

62

## 63 RESULTS

64

### 65 **F-actin crosslinking proteins Fimbrin Fim1 and $\alpha$ -actinin Ain1 compete at the** 66 **contractile ring and at actin patches**

67 We speculated that competition with contractile ring ABPs prevents Fim1 from strongly  
68 associating with the contractile ring. Increasing the percentage of soluble Fim1 might  
69 therefore allow Fim1 to outcompete its contractile ring competitors. As Fim1 is  
70 concentrated in actin patches (Nakano *et al.*, 2001; Wu *et al.*, 2001), actin patch depletion  
71 by treatment with the Arp2/3 complex inhibitor CK-666 (Nolen *et al.*, 2009; Burke *et al.*,  
72 2014) is expected to result in a rapid increase of free Fim1 in the cytoplasm. When fission  
73 yeast cells expressing Lifeact-GFP were treated with CK-666, we observed a depletion  
74 of actin patches and the formation of excessive 'ectopic' actin cable and contractile ring  
75 material (Figure 1A) (Burke *et al.*, 2014).

76 In control (DMSO-treated) cells, Fim1-GFP localized predominantly to actin  
77 patches, with only a small amount associating with the contractile ring (Figure 1B, left)  
78 (Wu *et al.*, 2001). However, following CK-666 treatment, Fim1-GFP strongly associated  
79 with the contractile ring and to a subset of ectopic F-actin (Figure 1B, right). The  
80 localization of most contractile ring ABPs, including formin Cdc12, type II myosin Myo2,  
81 myosin regulatory light chain Rlc1, the IQGAP Rng2 and tropomyosin Cdc8, was  
82 unaffected by CK-666 treatment, (Figure 1—figure supplement 1 and Figure 1—figure  
83 supplement 2). Conversely, Ain1 was depleted from the contractile ring following CK-666  
84 treatment (Figure 1C). Therefore, we hypothesized that Fim1 and Ain1 are competitors,  
85 and that enhanced Fim1 association with the contractile ring following CK-666 treatment  
86 displaces Ain1. We tested this hypothesis by observing Ain1 localization in a strain lacking  
87 Fim1 (*fim1-1 $\Delta$* , Ain1-GFP). In the absence of Fim1, Ain1-GFP was not displaced from the  
88 contractile ring following CK-666 treatment (Figure 1D). Localization of Fim1 to the  
89 contractile ring and displacement of Ain1 from the contractile ring occurred at all stages  
90 of contractile ring assembly and constriction (Figure 1-figure supplement 3).

91 If competition between Fim1 and Ain1 is a primary driver of their sorting to distinct  
92 F-actin networks, we expected to observe Ain1-GFP erroneously localized at actin

93 patches in the absence of Fim1. However, we observed Ain1-GFP at actin patches in less  
94 than 1% of *fim1-1Δ* cells (Figure 1G, Video 1). It is possible that a combination of the low  
95 number of Ain1 molecules ( $\sim 3,600 \pm 500$ , (Wu and Pollard, 2005)), and the high density of  
96 F-actin in actin patches (5,000-7,000 actin molecules in each of 30-50 actin patches, (Wu  
97 and Pollard, 2005; Sirotkin *et al.*, 2010)), may dilute the Ain1-GFP signal beyond  
98 detection. Therefore, increasing the concentration of Ain1-GFP might allow observable  
99 Ain1-GFP at actin patches, but only in a *fim1-1Δ* background. Indeed, Ain1-GFP  
100 overexpressed under the 41xnmt promoter was observed to localize to actin patches in  
101  $\sim 67\%$  of *fim1-1Δ* cells (Figure 1F-G, Video 1), but in only  $\sim 10\%$  of cells expressing  
102 endogenous Fim1 (Figure 1E,G, Video 1). These findings indicate that Ain1 is less able  
103 to associate with actin patches in the presence of Fim1, suggesting that Fim1 and Ain1  
104 compete for association with F-actin in actin patches as well as the contractile ring.

105

### 106 **Fimbrin Fim1 and $\alpha$ -actinin Ain1 dynamics on F-actin define their competitive** 107 **effectiveness**

108 Ultrastructural and mutational studies of fimbrin/plastin and  $\alpha$ -actinin from several  
109 organisms revealed that they bind to a similar site on F-actin (Holtzman *et al.*, 1994; Honts  
110 *et al.*, 1994; McGough *et al.*, 1994; Galkin *et al.*, 2010; Galkin *et al.*, 2008). However,  
111 while fission yeast fimbrin Fim1 is relatively stable on single filaments ( $k_{\text{off}} = 0.043 \pm 0.001$   
112  $\text{s}^{-1}$ ) and very stable on F-actin bundles ( $k_{\text{off}} = 0.023 \pm 0.003 \text{ s}^{-1}$ ) (Skau *et al.*, 2011),  $\alpha$ -actinin  
113 Ain1 has not been observed on single filaments and is extremely dynamic on F-actin  
114 bundles ( $k_{\text{off}} = 3.33 \text{ s}^{-1}$  on two-filament and three-filament bundles) (Li *et al.*, 2016).  
115 Therefore, we hypothesized that Fim1's longer residence time on F-actin bundles may  
116 explain its ability to outcompete Ain1 for the same F-actin binding site. To test this  
117 possibility we took advantage of the Ain1 mutant Ain1(R216E), which is less dynamic on  
118 F-actin bundles ( $k_{\text{off}} = 0.67 \text{ s}^{-1}$  and  $k_{\text{off}} = 0.33 \text{ s}^{-1}$  on two- and three-filament bundles,  
119 respectively) (Li *et al.*, 2016), and assessed its ability to compete with Fim1 in vitro and  
120 in vivo.

121 We utilized multi-color TIRF microscopy (TIRFM) to visualize fluorescently labeled  
122 Fim1 in the presence or absence of unlabeled Ain1 on actin filaments. 50 nM Fim1-TMR  
123 fully decorated actin bundles and was also present on single actin filaments (Figure 2A-  
124 B). Compared to Fim1-TMR alone, less Fim1-TMR was associated with single actin  
125 filaments and two filament F-actin bundles in the presence of either 1  $\mu\text{M}$  wild-type Ain1  
126 or Ain1(R216E) (Figure 2A-B). However, there was little difference in the amount of Fim1-  
127 TMR associated with single filaments or two-filament bundles in the presence of wild-type  
128 Ain1 or mutant Ain1(R216E).

129 Unlike the in vitro results, the less dynamic Ain1(R216E) mutant was better than  
130 wild-type Ain1 at competing with fimbrin Fim1 in vivo. In fission yeast cells expressing  
131 endogenous levels of Fim1, overexpressed mutant Ain1(R216E)-GFP localized to actin  
132 patches in 100% of cells (Figure 2C,E, Video 2), while overexpressed wild-type Ain1-GFP  
133 was localized to actin patches in only  $\sim 9\%$  of cells (Figure 2C,D, Video 2). The disparity  
134 between Ain1(R216E)'s ability to compete with Fim1 in vitro versus in vivo potentially  
135 suggests that slight differences in dynamics may have a bigger effect in a cellular context.  
136 In particular, the dynamics of ABPs such as Ain1 may be finely tuned to allow for proper  
137 sorting given the large number of actin interacting proteins, with a small change in  
138 dynamics skewing the sorting. Alternatively, it is possible that certain aspects of our in

139 vitro system (such as muscle vs fission yeast actin or post-translational modifications of  
140 Fim1 (Miao *et al.*, 2016)) do not mimic the exact conditions present in vivo.

141  
142 **Tropomyosin Cdc8 and  $\alpha$ -actinin Ain1 do not compete for association with actin**  
143 **filaments**

144 We previously reported that tropomyosin Cdc8, an F-actin side-binding protein that  
145 associates with the contractile ring, is displaced from F-actin by fimbrin Fim1 and is  
146 therefore prevented from associating with actin patches (Figure 3E-F) (Skau and Kovar,  
147 2010; Christensen *et al.*, 2017). However, as fimbrin/plastin and  $\alpha$ -actinin isoforms bind  
148 to the same site on F-actin, we wondered if Cdc8 and  $\alpha$ -actinin Ain1 can associate with  
149 actin filaments simultaneously. In multi-color in vitro TIRFM assays, we observed no  
150 displacement of Cdc8 from Ain1- or Ain1(R216E)-bundled networks (Figure 3A-D, Video  
151 3), demonstrating that Ain1 and Cdc8 are capable of co-existing on the same F-actin  
152 network in vitro, as they do at the contractile ring in cells. Remarkably, TIRFM assays  
153 also revealed that Cdc8 actually enhanced the bundling ability of Ain1 (Figure 4G-J). 500  
154 nM Cdc8 increased Ain1-mediated bundling 10-fold over Ain1 alone (Figure 4K, Video 4).  
155 This finding is surprising as Ain1 is generally considered to be a poor bundling protein (Li  
156 *et al.*, 2016), and suggests that the combination of Ain1 and Cdc8 may allow for significant  
157 bundling to occur in the context of the contractile ring despite Ain1's poor bundling ability  
158 alone.

159  
160 **Tropomyosin Cdc8 and  $\alpha$ -actinin Ain1 cooperate to displace fimbrin Fim1 from**  
161 **actin filaments**

162 On their own, both  $\alpha$ -actinin Ain1 and tropomyosin Cdc8 are outcompeted by fimbrin Fim1  
163 for binding to F-actin. Furthermore, there are ~86,500 Fim1 polypeptides in the cell, but  
164 only ~3,600 Ain1 molecules (Wu and Pollard, 2005), raising the question as to why more  
165 Fim1 is not associated with the contractile ring in wild-type cells. Given that Cdc8  
166 enhances the bundling ability of Ain1, we speculated that the combination of Cdc8 and  
167 Ain1 might inhibit Fim1 association with contractile ring actin filaments. We tested this  
168 possibility by performing three-color TIRFM with labeled ABPs and quantified Fim1  
169 association with F-actin in the presence of Cdc8 and/or Ain1. As described above, in the  
170 absence of other ABPs, Fim1 fully coats F-actin bundles (Figure 2A,B). In the presence  
171 of either Cdc8 (Figure 5A,D) or Ain1 (Figure 2A,B) alone, less Fim1 is associated with  
172 two-filament bundles, demonstrating that though Fim1 is a better competitor than both  
173 Ain1 and Cdc8, both compete to different extents with Fim1 for association with F-actin.

174 In the absence of Ain1, Cdc8 is displaced from F-actin bundles by Fim1 in a  
175 cooperative manner, with segments of F-actin bundles completely devoid of Cdc8,  
176 concurrent with regions of high Fim1 localization (Figure 5A, Video 5, (Christensen *et al.*,  
177 2017)). Conversely, in reactions containing Ain1, ~16% less Cdc8 is displaced by Fim1  
178 from two-filament F-actin bundles (Figure 5B,C, Video 5). Additionally, ~90% less Fim1  
179 is observed to associate with these bundles (Figure 5B,D, Video 5), suggesting that the  
180 combination of Ain1 and Cdc8 are capable of preventing Fim1 association with F-actin  
181 networks. We speculate that though Ain1 alone is a poor competitor with Fim1, its  
182 competition for the same binding site as Fim1 allows it to prevent long stretches of Fim1  
183 from forming that might be capable of displacing Cdc8. The inability of Fim1 to  
184 cooperatively associate on F-actin, along with Cdc8's ability to compete it off of actin

185 filaments result in Fim1 poorly associating with F-actin in the presence of both Cdc8 and  
186 Ain1.

## 187 **DISCUSSION**

### 188 **Fimbrin Fim1 association with the contractile ring is regulated by several** 189 **mechanisms**

191 We have demonstrated that fimbrin Fim1 is prevented from associating with actin  
192 filaments by the combined efforts of contractile ring ABPs  $\alpha$ -actinin Ain1 and tropomyosin  
193 Cdc8. Our model is that Fim1's association with the contractile ring is inhibited by (1) a  
194 preferred association with actin patches, and (2) the combined activity of Cdc8 and Ain1  
195 (Figure 5). If Fim1 preferentially associates with actin patches over other F-actin  
196 networks, actin patches could act as a 'sink' for Fim1, thereby sequestering Fim1 from  
197 associating with other F-actin networks. A preference of Fim1 for actin patches could  
198 potentially result from an architectural preference for branched F-actin or a particular twist  
199 or conformational change of Arp2/3 complex-assembled F-actin. Alternatively, other  
200 upstream ABPs could recruit Fim1 to actin patches by other mechanisms. Future work  
201 will involve investigating these upstream signals and their involvement in regulating ABP  
202 sorting.

### 203 **ABP dynamics mediate competitive interactions**

204 We discovered that the contractile ring ABP  $\alpha$ -actinin Ain1 competes with fimbrin Fim1,  
205 and that their dynamics regulate their ability associate with different F-actin networks. In  
206 particular, we found that a less dynamic mutant Ain1(R216E) localized to F-actin patches  
207 in the presence of Fim1. However, in addition to mislocalizing to actin patches,  
208 Ain1(R216E)-expressing cells also have cytokinesis defects (Li *et al.*, 2016). These  
209 findings may explain why fission yeast requires two F-actin bundling proteins. Actin  
210 patches require a stable F-actin bundler such as Fim1 to prevent tropomyosin Cdc8  
211 association, and to create boundaries that enhance Adf1-mediated severing (Skau and  
212 Kovar, 2010; Christensen *et al.*, 2017). On the other hand, a dynamic F-actin bundler is  
213 required at the contractile ring to facilitate anti-parallel F-actin contacts while still allowing  
214 Cdc8 association and myosin sliding (Li *et al.*, 2016). Additionally, binding dynamics seem  
215 to mediate Ain1 and Fim1 competition with Cdc8. We demonstrated that Fim1, but not  
216 Ain1, displaces Cdc8 from F-actin bundles. However, Fim1 competes with Cdc8  
217 specifically at regions where it binds stably (F-actin bundles), and does not compete as  
218 strongly with Cdc8 on single filaments (Christensen *et al.*, 2017). Therefore, the presence  
219 of a dynamic bundling protein (Fim1 on single filaments and Ain1 on both single and  
220 bundled filaments) may allow Cdc8 to remain associated with F-actin in those  
221 circumstances.

222 Additionally, increasing concentrations of Cdc8 actually enhance F-actin bundling  
223 in the presence of Ain1 (Figure 3G-K). This bundling enhancement could potentially arise  
224 from (1) Cdc8 increasing the residence time of Ain1 on F-actin, or (2) Cdc8 altering the  
225 persistence length of F-actin, making the stiffer actin filaments more likely to be  
226 incorporated and maintained in a bundle. As we suspect that lowering Ain1 dynamics may  
227 negatively affect both contractile ring assembly and constriction (Li *et al.*, 2016), we favor  
228 the second mechanism.

229  
230

## 231 **Tropomyosin Cdc8 and $\alpha$ -actinin Ain1 work together to compete with fimbrin Fim1** 232 **at the contractile ring**

233 Despite the ability of fimbrin Fim1 to actively displace tropomyosin Cdc8 from F-actin  
234 bundles (Figure 3E-F), Cdc8 is also capable of inhibiting Fim1 association with F-actin  
235 (Figure 5D). Together, we observe that, in our experiments,  $\alpha$ -actinin Ain1 and Cdc8  
236 prevent ~90% of Fim1 association with F-actin bundles. Alone, Cdc8 prevents ~50% of  
237 Fim1 association while Ain1 alone prevents less than 35% of Fim1 association. It should  
238 be noted that though Ain1 and Cdc8 work together to compete with Fim1, our reactions  
239 contain low concentrations (50 nM) of Fim1 compared to Ain1 (500 nM or 1  $\mu$ M) and Cdc8  
240 (2.5  $\mu$ M). Similarly, given the potent F-actin binding and bundling capabilities of Fim1, a  
241 reasonable assumption is that in a cell Cdc8 and Ain1 may only prevent a portion of Fim1  
242 polypeptides from associating with contractile ring F-actin. One possibility is that other  
243 ABPs or sets of ABPs at the contractile ring help inhibit Fim1 association. Secondly,  
244 budding yeast fimbrin Sac6 is phosphorylated at different stages of the cell cycle, which  
245 affects its ability to bundle F-actin (Miao *et al.*, 2016). Fission yeast Fim1 might be similarly  
246 post-translationally modified, and therefore a portion of the cytoplasmic Fim1 pool might  
247 be more or less active. A third non-mutually exclusive possibility is that the actin assembly  
248 factors Arp2/3 complex (actin patches) and formin (contractile ring) may bias sorting of  
249 ABPs to particular F-actin networks. Future work will seek to determine the contribution  
250 of actin assembly factors to ABP sorting, and whether Fim1 and other ABPs are post-  
251 translationally modified and how these modifications affect their ability to compete with  
252 other ABPs and sort to the correct F-actin network.

## 253 **ACKNOWLEDGMENTS**

254 This work was supported by NIH R01 GM079265 and ACS RSG-11-126-01-CSM (to  
255 D.R.K.), NIH MCB Training Grant T32 GM0071832 (to J.R.C. and K.E.H.), Initiative for  
256 Maximizing Student Development (IMSD) NIGMS R25GM109439 (to M.E.O) and NSF  
257 Graduate Student Fellowship DGE-1144082 (to J.R.C.). Additional support was provided  
258 to D.R.K. by the University of Chicago MRSEC, funded by the NSF through grant DMR-  
259 1420709. We thank Charlie Dulberger and Yujie Li for assistance with Ain1 purification.  
260 We also thank Alisha Morganthaler for assistance with preliminary experiments and  
261 Jonathan Winkelman, Cristian Suarez, and the Kovar lab for helpful discussions.  
262

## 263 **MATERIALS AND METHODS**

### 264 **Strain construction and growth**

265 Fission yeast strains were created by genetic crossing on SPA5S plates followed by  
266 tetrad dissection on YE5S plates. Strains were screened for auxotrophic (leu, ura) or  
267 antibiotic (nat, kan) markers and maintained on YE5S plates. Glycerol stocks were  
268 created by pelleting cells and resuspending in 750  $\mu$ L media and 250  $\mu$ L of 50% sterile  
269 glycerol.  
270

### 271 **Cell imaging and treatment with CK-666**

272 For live cell imaging, cells were grown in YE5S media overnight at 25°C, subcultured into  
273 EMM5S media without thiamine, and kept in log phase for 20-22 hours at 25°C. Cells  
274 were imaged directly on glass slides. Z-stacks of 10 slices, 0.5  $\mu$ m apart were acquired  
275 with a 100x, 1.4 NA objective on a Zeiss Axiovert 200M equipped with a Yokogawa CSU-

276 10 spinning-disk unit (McBain, Simi Valley, CA) illuminated with a 50-milliwatt 473-nm  
277 DPSS laser, and a Cascade 512B EM-CCD camera (Photometrics, Tucson, AZ)  
278 controlled by MetaMorph software (Molecular Devices, Sunnyvale, CA). For CK-666  
279 treatments, CK-666 powder stock (Sigma, St. Louis, MO) was diluted to 10 mM in DMSO.  
280 Cells were grown as stated above, and incubated with CK-666 or an equivalent volume  
281 of DMSO (control) in a rotator at 25°C for 30 min prior to imaging. Cells were then  
282 immediately imaged as above.

283

### 284 **Contractile ring fluorescence quantification**

285 Contractile ring maturation was divided into three stages by measuring the distance  
286 between spindle pole bodies (SPBs, visualized by Sad1-tdTomato) and noting  
287 constriction of the contractile ring. Stage 1 cells had SPBs less than 6  $\mu\text{m}$  apart, with no  
288 observable ring constriction. Stage 2 cells had SPBs greater than 6  $\mu\text{m}$  apart, with no  
289 observable ring constriction. Stage 3 cells had SPBs less than 9  $\mu\text{m}$  apart, with evident  
290 ring constriction. Quantification of ABP association with defined contractile rings (stages  
291 2 and 3) is shown in Figure 1B-D, and quantification at each distinct ring stage is show in  
292 Figure 1, figure supplement 3. The contractile ring region was determined by visually  
293 examining the z-stack for the ring site. Normalized contractile ring fluorescence was taken  
294 by drawing a region of interest (ROI) around the observed ring and around the whole cell  
295 using ImageJ. The mean fluorescence of the ring divided by the whole cell was then  
296 determined. A value of 1.00 indicates no increased fluorescence at the site of the  
297 contractile ring, while values  $>1$  indicate increased fluorescence at the ring. Maximum  
298 projections created in ImageJ (Schindelin *et al.* 2012; Schneider *et al.* 2012) were used  
299 for figure images and sum projections were used for quantification.

300

### 301 **Tropomyosin Cdc8 antibody staining**

302 Following standard growth and culturing protocols for live cell imaging, fission yeast cells  
303 were stained with anti-Cdc8p (Cranz-Mileva *et al.*, 2015). Cells were first fixed in 16%  
304 formaldehyde for 5 minutes at 20°C. Cells were then washed in cold 1X PBS and  
305 resuspended in 140  $\mu\text{L}$  1.2M sorbitol. 60  $\mu\text{L}$  fresh protoplasting solution (3 mg/ml  
306 zymolase 100T in 1.2M sorbitol) was added and cells were incubated for 7 minutes on a  
307 rotator at room temperature. 1 mL of 1% Triton-X was then added to the cells and  
308 incubation continued for 2 minutes. Cells were then pelleted and resuspended in 0.5 mL  
309 PBAL (10% BSA, 100 mM lysine monohydrochloride, 1 mM  $\text{NaN}_3$ , 50 ng/ml ampicillin in  
310 PBS) and incubated for 2.5 hours on a rotator at room temperature. Cells were  
311 resuspended in 100  $\mu\text{L}$  of anti-Cdc8p 1:10 in PBAL (gift of Sarah Hitchcock-DeGregori)  
312 and incubated overnight at 4°C on a rotator. Following incubation with primary antibody,  
313 cells were washed 3 times with 0.5 mL PBAL, resuspended in 50  $\mu\text{L}$  Alexa-Flour 555 goat  
314 anti-rabbit secondary antibody (Thermo-Fisher Scientific, Carlsbad, CA) (1:100 in PBAL),  
315 and incubated for 90 minutes at room temperature on a shaker in the dark. Cells were  
316 then washed 5 times with 0.5 mL PBAL and resuspended in 20-30  $\mu\text{L}$  PBAL for imaging.  
317 Cells were stored at 4°C and imaged within 48 hours of staining.

318

### 319 **Phallicidin staining**

320 BODIPY-phallicidin staining of fission yeast cells was adapted from Sawin and Nurse,  
321 1998. BODIPY-phallicidin powder (Thermo Fisher Scientific, Waltham, MA) was

322 resuspended to a concentration of 0.2 units/ $\mu$ L in methanol, aliquoted, lyophilized, and  
323 stored at  $-20^{\circ}\text{C}$ . Fission yeast were grown overnight in YE5S media and fixed in 16%  
324 paraformaldehyde for 5 minutes at room temperature. Cells were washed with room  
325 temperature PEM buffer 3 times and permeabilized in PEM with 1% triton X-100 for  
326 exactly 1 minute. Cells were then spun for 30 seconds at 7000 RPM. Cells were washed  
327 in PEM buffer 3 times and resuspended in 10  $\mu$ L PEM buffer. Lyophilized BODIPY-  
328 phalloidin was resuspended to 1 unit/ $\mu$ L. 1  $\mu$ L (1 unit) of resuspended phalloidin was  
329 added to 10  $\mu$ L of cells in PEM buffer and incubated in the dark for 30 minutes at room  
330 temperature. Following incubation in the dark, cells were washed with 1 mL PEM and  
331 spun at 7000 RPM for 30 seconds. Supernatant was removed and cells resuspended in  
332 a small volume. For cells stained with anti-Cdc8p and BODIPY-phalloidin, cells were first  
333 treated with primary and secondary antibodies, washed with PBAL, and then stained with  
334 BODIPY-phalloidin.

335

### 336 **Protein purification**

337 Chicken skeletal muscle actin was purified as described previously (Spudich and Watt,  
338 1971). Fimbrin Fim1 and tropomyosin AlaSer-Cdc8 (WT and I76C mutant) were  
339 expressed in BL21-Codon Plus (DE3)-RP (Agilent Technologies, Santa Clara, CA). His-  
340 tagged Fim1 was purified using Talon Metal Affinity Resin (Clontech, Mountain View, CA)  
341 (Skau and Kovar, 2010). Cdc8 was purified by boiling the cell lysate, performing an  
342 ammonium sulfate cut, and running on an anion exchange column (Skau and Kovar,  
343 2010). His-tagged wild-type  $\alpha$ -actinin Ain1 and mutant Ain1(R216E) were expressed in  
344 High Five insect cells using baculovirus expression and purified using Talon Metal Affinity  
345 Resin (Li *et al.*, 2016).

346 The  $A_{280}$  of purified proteins was taken with a Nanodrop 2000c Spectrophotometer  
347 (Thermo-Scientific, Waltham, MA). Protein concentration was calculated using extinction  
348 coefficients Fim1:  $55,140 \text{ M}^{-1} \text{ cm}^{-1}$ , Cdc8 (WT and I76C mutant):  $2,980 \text{ M}^{-1} \text{ cm}^{-1}$ , Ain1 and  
349 Ain1(R216E):  $86477 \text{ M}^{-1} \text{ cm}^{-1}$ . Proteins were labeled with TMR-6-maleimide (Life  
350 Technologies, Grand Island, NY) or Cy5-monomaleimide (GE Healthcare, Little Chalfont,  
351 UK) dyes following manufacturer's protocols following purification. Proteins were flash-  
352 frozen in liquid nitrogen and stored at  $-80^{\circ}\text{C}$ .

353

### 354 **TIRF microscopy**

355 Time-lapse TIRFM movies were obtained using an Olympus IX-71 microscope with  
356 through-the-objective TIRF illumination, iXon EMCCD camera (Andor Technology), and  
357 a cellTIRF 4Line system (Olympus). The actin binding proteins (ABPs) of interest were  
358 initially added to a polymerization mix (10 mM imidazole (pH 7.0), 50 mM KCl, 1 mM  
359  $\text{MgCl}_2$ , 1 mM EGTA, 50 mM DTT, 0.2 mM ATP, 50  $\mu$ M  $\text{CaCl}_2$ , 15 mM glucose, 20  $\mu$ g/mL  
360 catalase, 100  $\mu$ g/mL glucose oxidase, and 0.5% (400 centipoise) methylcellulose). This  
361 ABP/polymerization mix was then added to Mg-ATP-actin (15% Alexa 488-labeled) to  
362 induce F-actin assembly in the presence of the ABPs of interest. The mixture was then  
363 added to a flow chamber and imaged at room temperature at 5 s intervals (unless  
364 otherwise noted).

365

### 366 **Quantification of bundling**



367 The percentage of actin filaments bundled was quantified at similar actin filament  
368 densities (between 2095 and 2295  $\mu\text{m}$  total filament length) for each experiment. The  
369 total actin filament length in the chamber was measured manually by creating ROIs for  
370 every actin filament and measuring total actin filament length in FIJI (Schindelin *et al.*,  
371 2012; Schneider *et al.*, 2012). ROIs for every segment of actin filament present in a  
372 bundle were then created and total bundled filament length measured. The ratio of actin  
373 filament present in a bundle vs. total actin filament length was then calculated.

374

#### 375 **Quantification of fluorescence intensity on actin filaments or bundles**

376 Fluorescence intensity on actin filaments was quantified on movies taken under the same  
377 microscope conditions (laser intensity and angle, exposure time) and with the same  
378 protein batches. Fluorescence intensity was quantified at the same time point in each  
379 compared movie. The actin channel was used to identify single actin filaments or two-  
380 filament actin bundles, and ROIs of a 3-pixel segmented line were created along all single  
381 filaments or two-filament bundles in the selected frame. The mean fluorescence for each  
382 segment was then measured using ImageJ.

383

#### 384 **Quantifying number of cells with Ain1 in actin patches**

385 To quantify the number of cells containing Ain1-GFP in actin patches, one minute  
386 timelapse movies of 1 frame per second were taken, imaging both Ain1-GFP and an actin  
387 patch marker (ArpC5-mCherry or Fim1-mCherry). Movie files for independent  
388 experiments and replicates were blinded and independently analyzed for number of cells  
389 containing Ain1-GFP in actin patches using FIJI (Schindelin *et al.*, 2012; Schneider *et al.*,  
390 2012). For a single cell to count as positively containing Ain1-GFP in actin patches, three  
391 criteria had to be met: 1) at least one distinguishable actin patch containing Ain1-GFP  
392 was observed, 2) the observed actin patch(es) contained Ain1-GFP for at least 3 frames  
393 and 3) the Ain1-GFP signal trajectory matched the channel expressing either ArpC5-  
394 mCherry or Fim1-mCherry. Total number of cells and cells with actin patches containing  
395 Ain1-GFP were then calculated to obtain percent of cells containing Ain1-GFP in actin  
396 patches.

397

398

399

400

401

402

403

404

405

406

407

408

409

410

411

412

413  
414

## Figures and Figure Legends

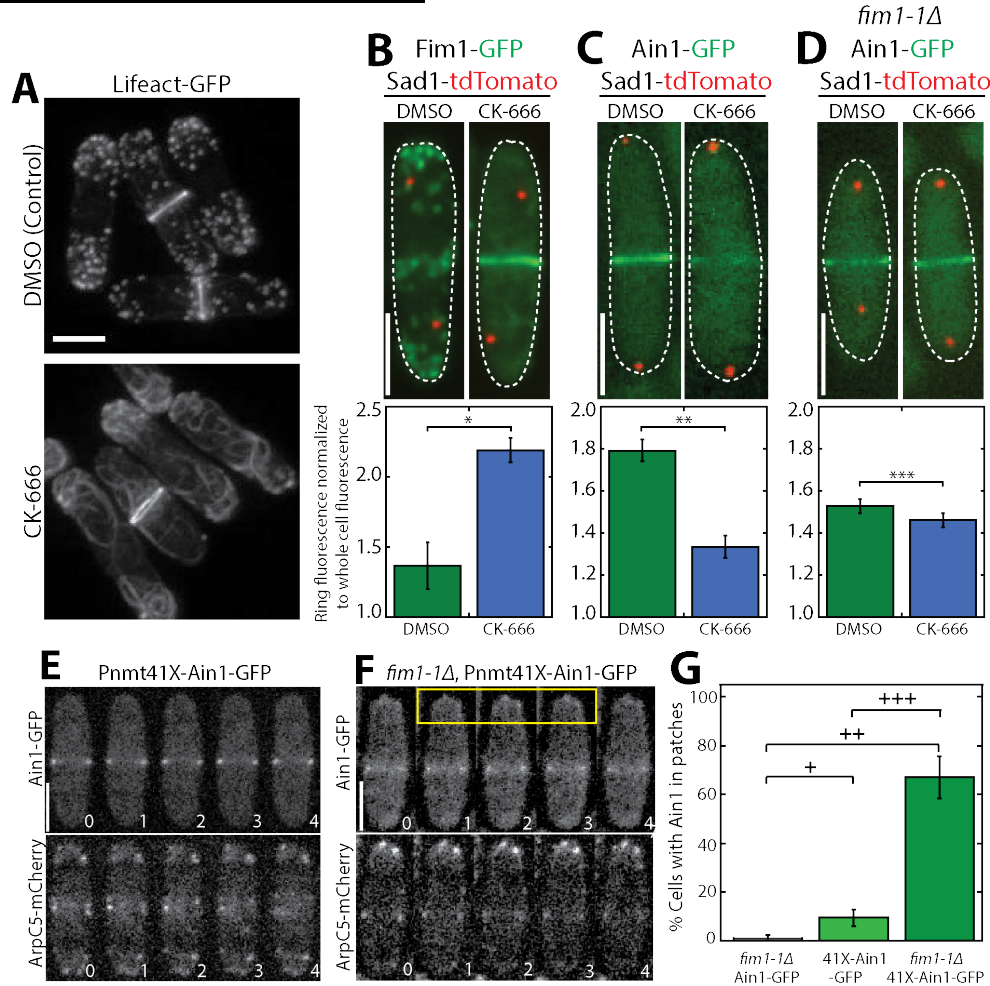

415

416

417

418

419

420

421

422

423

424

425

426

427

428

429

430

431

432

### Figure 1 - Fimbrin Fim1 and $\alpha$ -actinin Ain1 compete for association with the contractile ring and actin patches.

(A) Fluorescence micrographs of fission yeast cells expressing Lifeact-GFP following treatment with DMSO (control, top) or 200  $\mu$ M Arp2/3 complex inhibitor CK-666 (bottom). (B-D, top panels) Fluorescence micrographs of fission yeast cells expressing Fim1-GFP (B), Ain1-GFP (C), or Ain1-GFP in a *fim1-1Δ* background (D), following treatment with DMSO (left) or 200  $\mu$ M CK-666 (right). Dotted lines outline cells. Scale bars, 5  $\mu$ m. (B-D, bottom panels) Mean Fim1-GFP (B) or Ain1-GFP (C,D) fluorescence at the contractile ring normalized to whole cell fluorescence. Error bars=s.e. Two-tailed t-tests for data sets with unequal variance yielded p-values \* $p=2.35 \times 10^{-5}$ , \*\* $p=1.11 \times 10^{-5}$ , \*\*\* $p=0.017$ .  $n \geq 13$  cells total in each condition from two independent experiments. (E-F) Time-lapse fluorescent micrographs of fission yeast cells expressing ArpC5-mCherry (bottom) and overexpressing GFP-tagged  $\alpha$ -actinin Ain1 from the 41xnmT promoter (top) for 20 hours in a wild-type (E) or *fim1-1Δ* background (F). Yellow box highlights Ain1-GFP localization at actin patches. Scale bars, 5  $\mu$ m. Time in sec. (G) Percentage of cells in which Ain1-GFP is observed in actin patches. Error bars=s.e. Two-tailed t-tests for data sets with

433 unequal variance yielded p-values  $^+p=0.113$ ,  $^{++}p=0.002$ ,  $^{+++}p=0.012$ . n=3 experimental  
434 replicates.

435

436

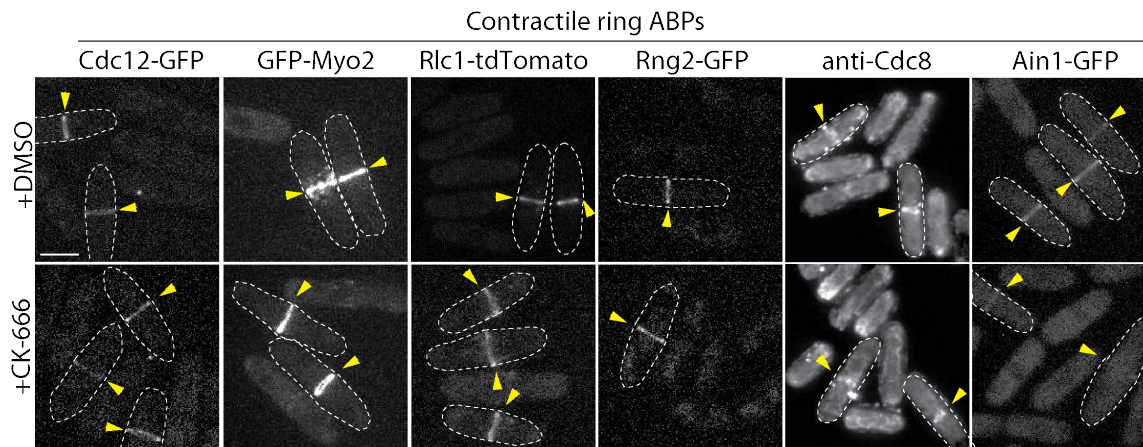

437

438 **Figure 1 – figure supplement 1. Contractile ring ABP localization following CK-666**  
439 **treatment.**

440 Fluorescent micrographs of fission yeast cells either immuno-stained (anti-Cdc8) or  
441 expressing fluorescently-tagged ABPs from the endogenous locus. Cells were treated  
442 with DMSO (control) or 200  $\mu$ M Arp2/3 complex inhibitor CK-666. Yellow arrowheads  
443 denote contractile rings. Dotted lines outline individual cells for clarity.

444

445

446

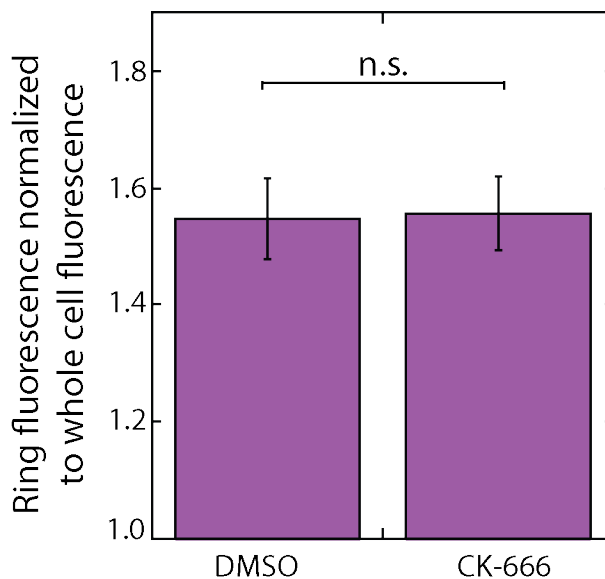

447

448 **Figure 1 – figure supplement 2. Tropomyosin Cdc8 does not leave the contractile**  
449 **ring following CK-666 treatment.**

450 Mean anti-Cdc8 contractile ring fluorescence normalized to total cell fluorescence. Error  
 451 bars=s.e. Two-tailed t-test for data sets with unequal variance yielded p-value=0.9338.  
 452 n≥10 cells in each condition.

453  
 454  
 455

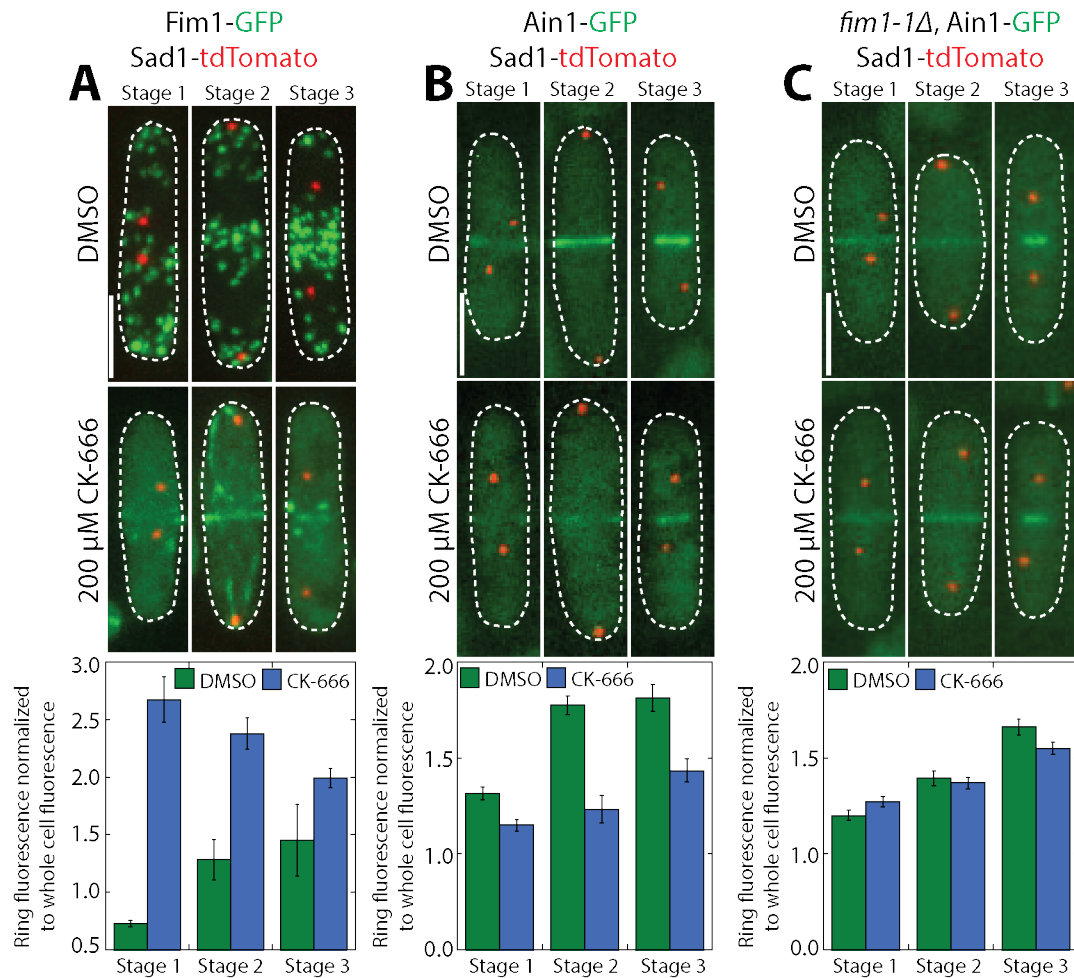

456

457 **Figure 1 – figure supplement 3. Fimbrin Fim1 displaces  $\alpha$ -actinin Ain1 from the**  
 458 **contractile ring following CK-666 treatment.**

459 **(A-C, top)** Fluorescent micrographs of fission yeast cells expressing spindle pole body  
 460 marker Sad1-tdTomato and Fim1-GFP **(A)**, Ain1-GFP **(B)**, or Ain1-GFP in a *fim1-1Δ*  
 461 background **(C)**, following treatment with DMSO (control, top) or 200 μM Arp2/3 complex  
 462 inhibitor CK-666 (bottom). Scale bars, 5 μm. **(A-C, bottom)** Mean Fim1-GFP **(A)** or Ain1-  
 463 GFP **(B,C)** contractile ring fluorescence normalized to whole cell fluorescence for cells in  
 464 stage 1 (contractile ring formation), stage 2 (contractile ring dwell), or stage 3 (contractile  
 465 ring constriction) of cytokinesis following treatment with DMSO (control) or 200 μM CK-  
 466 666. Quantification of cells from stages 2 and 3 are also shown in Figure 1B-D. Dotted  
 467 lines outline cells. Error bars=s.e. n≥6 cells for each condition.

468

469

470

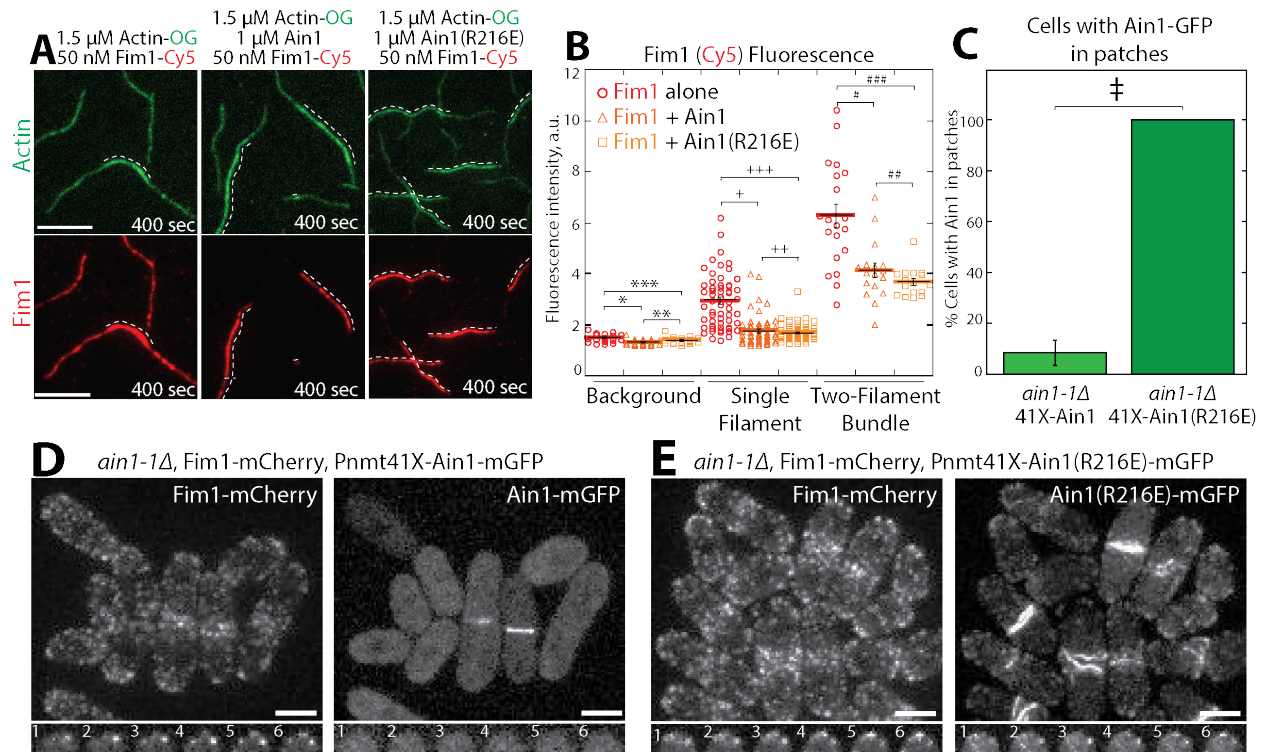

471

472

473 **Figure 2: Fimbrin Fim1 and  $\alpha$ -actinin Ain1 competition is driven by their residence**  
 474 **time on F-actin.**

475 **(A-C)** Two-color TIRFM of 1.5  $\mu$ M Mg-ATP actin (15% Alexa 488-labeled) with 50 nM  
 476 fimbrin Fim1 (Cy5-labeled) alone, or with either 1  $\mu$ M wild-type  $\alpha$ -actinin Ain1 or mutant  
 477 Ain1(R216E). Scale bars, 5  $\mu$ m. Dotted lines denote bundled regions. **(B)** Dot plots of the  
 478 amount of Fim1-Cy5 fluorescence on the background (coverglass), single actin filaments,  
 479 or two-filament F-actin bundles in either the absence (red circles) or presence of Ain1  
 480 (orange triangles) or Ain1(R216E) (yellow squares). Error bars=s.e. Two-tailed t-tests for  
 481 data sets with unequal variance yielded p-values \* $p=2.16 \times 10^{-4}$ , \*\* $p=0.054$ , \*\*\* $p=0.026$ ,  
 482  $^{\dagger}p=1.13 \times 10^{-10}$ ,  $^{++}p=0.46$ ,  $^{+++}p=2.39 \times 10^{-12}$ , and  $^{\#}p=3.90 \times 10^{-4}$ ,  $^{\#\#}p=0.18$ ,  $^{\#\#\#}p=1.97 \times 10^{-5}$ .  
 483 Two independent experiments were performed for each condition. In total,  $n=20$   
 484 background measurements,  $n \geq 54$  single filament measurements, and  $n \geq 16$  two-filament  
 485 bundle measurements were taken for each condition. **(C)** Percentage of cells in which  
 486 Ain1-GFP is observed in actin patches. Two-tailed t-test for data sets with unequal  
 487 variance yielded  $^{\dagger}p$ -value=0.0029. **(D,E, top)** Fluorescence micrographs of fission yeast  
 488 in an *ain1-1 $\Delta$*  background overexpressing GFP-tagged wild-type Ain1 **(D)** or mutant  
 489 Ain1(R216E) **(E)** from the 41Xnmt1 promoter. **(D,E, bottom)** Timelapse (in sec.) of cell  
 490 end taken from a single Z-plane.

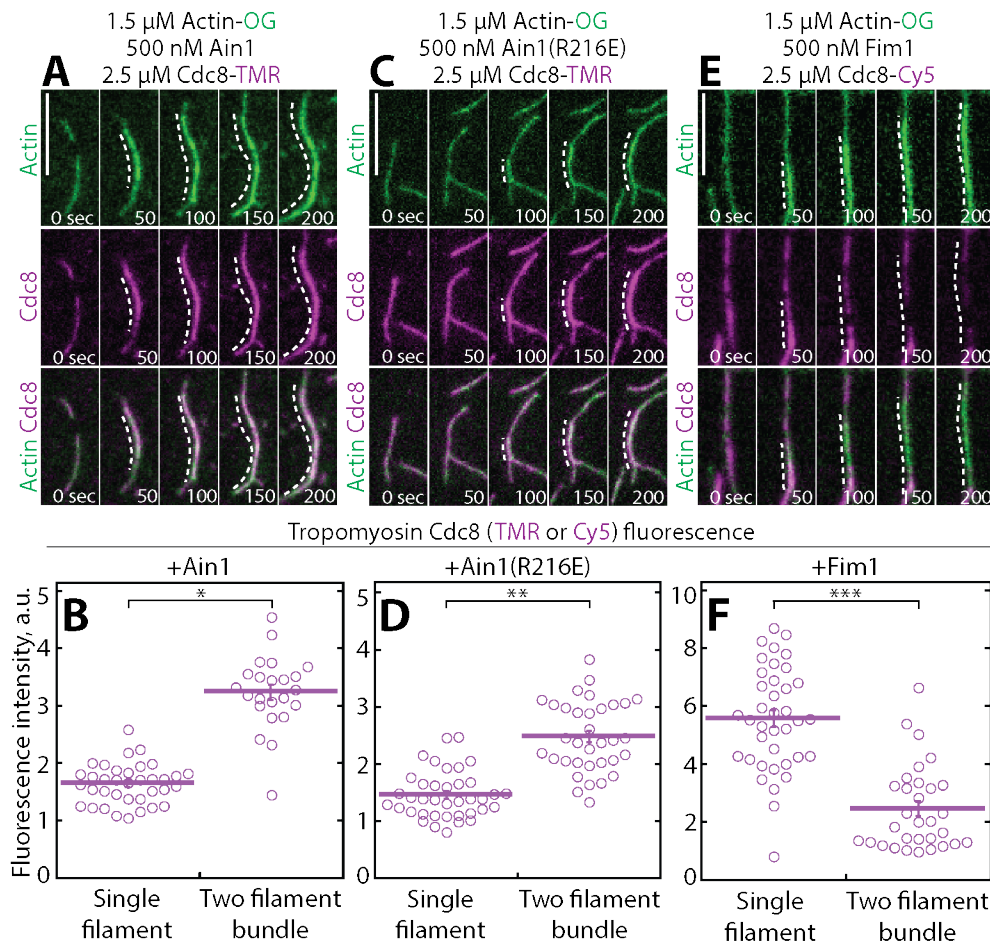

491  
492

493 **Figure 3:  $\alpha$ -actinin Ain1 does not displace Tropomyosin Cdc8 from F-actin**  
494 **bundles *in vitro*.**

495 **(A,C,E)** Two-color TIRFM of 1.5  $\mu$ M Mg-ATP actin (15% Alexa 488-labeled) with 2.5  $\mu$ M  
496 tropomyosin Cdc8 (TMR-labeled) and 500 nM **(A)** wild-type  $\alpha$ -actinin Ain1, **(B)** mutant  
497 Ain1(R216E), or **(C)** fimbrin Fim1 (unlabeled). Scale bars, 1  $\mu$ m. Dotted lines denote  
498 bundled regions. **(B,D,F)** Dot plots of the amount of Cdc8-TMR or Cdc8-Cy5 fluorescence  
499 on single filaments or two-filament bundles in the presence of Ain1 **(B)**, Ain1(R216E) **(D)**,  
500 or Fim1 **(F)**. Error bars=s.e. Two-tailed t-tests for data sets with unequal variance yielded  
501 p-values \* $p=8.24 \times 10^{-18}$ , \*\* $p=5.47 \times 10^{-12}$ , \*\*\* $p=5.72 \times 10^{-11}$ .

502

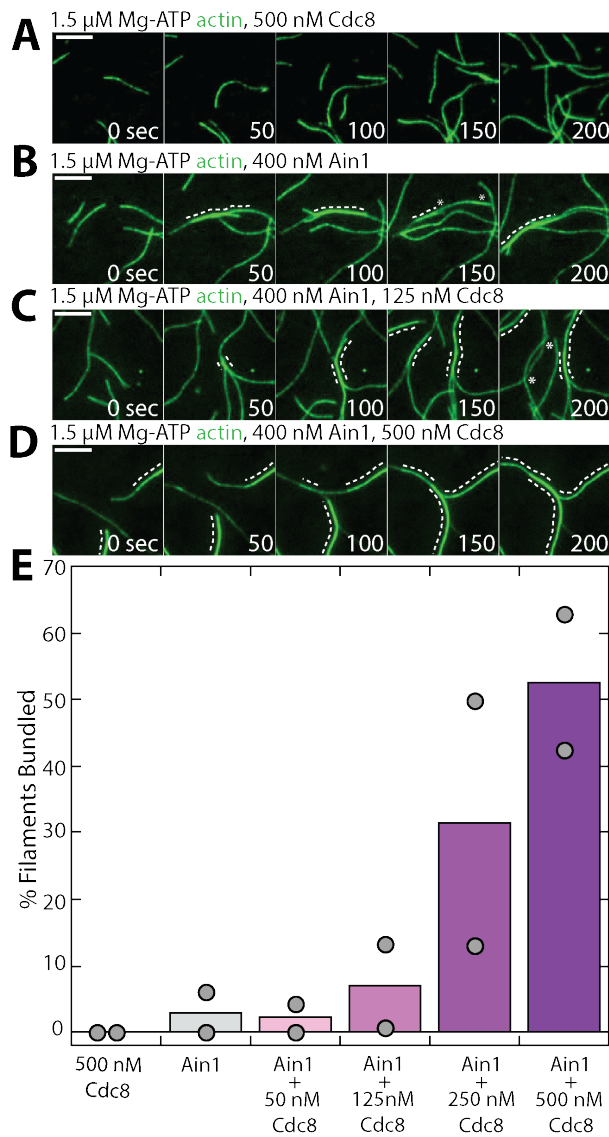

503

504 **Figure 4: Tropomyosin Cdc8 enhances  $\alpha$ -actinin Ain1-mediated F-actin bundling in**  
505 **vitro. (A-D) TIRFM of 1.5  $\mu$ M Mg-ATP actin (15% Alexa 488-labeled) in the presence of**  
506 **500 nM Cdc8 (A) or 400 nM Ain1 and 0 (B), 125 (C), or 500 nM (D) Cdc8. Dotted lines**  
507 **indicate the bundled region. Scale bars, 5  $\mu$ m. (E) Quantification of the percent of bundled**  
508 **F-actin with 400 nM Ain1 and a range of tropomyosin Cdc8 concentrations. Bars indicate**  
509 **averages and gray circles indicate values from independent TIRFM experiments. n=2**  
510 **independent experiments for each condition.**

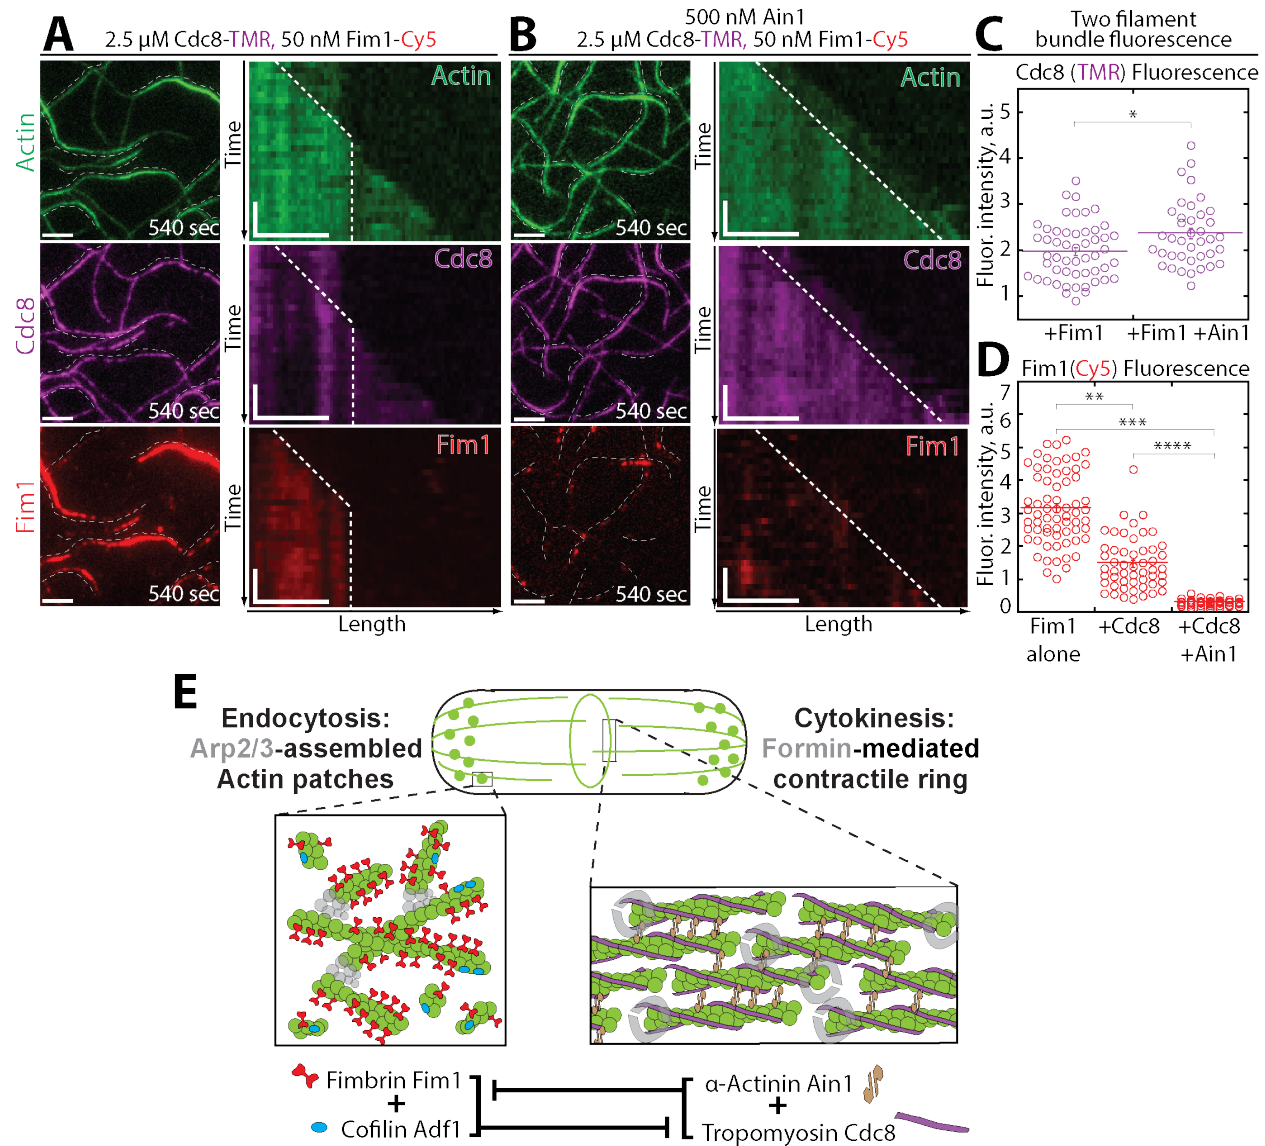

511

512 **Figure 5: Tropomyosin Cdc8 and  $\alpha$ -actinin Ain1 cooperate to compete with**  
 513 **fimbrin Fim1 for association with F-actin in vitro.**

514 **(A-C)** Three-color TIRFM of 1.5  $\mu\text{M}$  Mg-ATP actin (15% Alexa 488-labeled) with 50 nM  
 515 fimbrin Fim1 (Cy5-labeled) and 2.5  $\mu\text{M}$  tropomyosin Cdc8 (TMR-labeled) in the **(A)**  
 516 absence or **(B)** presence of 500 nM unlabeled  $\alpha$ -actinin Ain1. **(A-B, left)** Representative  
 517 TIRF field 540 seconds following reaction initiation. **(A-B, right)** Kymographs of actin,  
 518 Fim1, and Cdc8 during bundle formation. Dotted lines denote bundled regions. Scale  
 519 bars, 2.5  $\mu\text{m}$ . Time bar, 30 seconds. **(C-D)** Dot plots of the amount of Cdc8-TMR **(C)** or  
 520 Fim1-Cy5 fluorescence **(D)** on two-filament bundles in experiments with Cdc8 and Fim1,  
 521 or Cdc8, Fim1 and Ain1. Purple and red lines denotes mean. Error bars=s.e. Two-tailed  
 522 t-tests for data sets with unequal variance yielded p-values \* $p=0.00716$ , \*\* $p=1.15 \times 10^{-15}$ ,  
 523 \*\*\* $p=2.68 \times 10^{-30}$ , \*\*\*\* $p=1.14 \times 10^{-14}$ .  $n \geq 30$  measurements from two independent  
 524 experiments. **(E)** Model of the involvement of ABP competition in ABP sorting in the fission  
 525 yeast cell. In endocytic actin patches, fimbrin Fim1 and cofilin Adf1 enhance each other's



526 activities, resulting in the displacement of tropomyosin Cdc8 from the F-actin network  
 527 (Christensen *et al.*, 2017). In the contractile ring,  $\alpha$ -actinin Ain1 and tropomyosin Cdc8  
 528 work together to prevent fimbrin Fim1 association with the F-actin network.

529 **Table 1: Fission yeast strains used in this study**

530

| Strain name | Genotype                                                                                                     | Reference                    |
|-------------|--------------------------------------------------------------------------------------------------------------|------------------------------|
| KV91        | h+, kanMX6::myo2p::gfp-myo2p+, ade6-M210, leu1-32, ura4-D18                                                  | Wu <i>et al.</i> , 2003      |
| KV343       | h?, cdc12-mGFP::KanR                                                                                         | This study                   |
| KV459       | h+, rlc1-tdTomato-natMX6 ade6-M210 leu1-32 ura4-D18                                                          | This study                   |
| KV579       | h-, ain1-GFP-KanMX6, URA+                                                                                    | Wu <i>et al.</i> , 2001      |
| KV588       | h+, pAct1 Lifeact-GFP::Leu+; ade6-m216; leu1-32; ura4-D18                                                    | Huang <i>et al.</i> , 2012   |
| KV707       | h-, leu1-32, his3-D1, ura4-D18, ade6-M216, Pnmt41-SpAin1-mGFP::Leu+                                          | This study                   |
| KV804       | h?, fim1-mCherry-natMX6, ain1- $\Delta$ 1:: kanMX6, Pnmt41-SpAin1-mGFP::Leu+                                 | This study                   |
| KV818       | h+ kanMX6-Prng2-mEGFP-rng2 ade6-M210 leu1-32 ura4-D18                                                        | Laporte <i>et al.</i> , 2011 |
| KV856       | h?, ain1- $\Delta$ 1:: kanMX6, Pnmt41-SpAin1(R216E)-mGFP::Leu+, fim1-mCherry-natMX6, ade6, leu1-32, ura4-D18 | This study                   |
| KV861       | h?, ain1-GFP-kanMX6, sad1-tdTomato-natMX6, ade6-m21?, leu1-32, ura4-D18                                      | This study                   |
| KV878       | h+, fim1-mGFP-kanMX6, sad1-tdTomato-natMX6                                                                   | This study                   |
| KV908       | h? fim1-1 $\Delta$ -kanMX6, ain1-GFP-kanMX6, sad1-tdTomato::natMX6                                           | This study                   |
| KV963       | h?, fim1-1 $\Delta$ ::kanMX6, Pnmt41-SpAin1-mGFP::Leu+                                                       | This study                   |
| KV968       | h? Pnmt41-SpAin1-mGFP::Leu+, ARPC5-mCherry-natMX6                                                            | This study                   |

531

532

533

534 **Video Legends**

535

536 **Video 1. Overexpressed Ain1-GFP localizes to actin patches in the absence of**  
537 **fimbrin, related to Figure 1.** Fission yeast cells expressing actin patch marker ArpC5-  
538 mCherry (right) with Ain1-GFP (left) at endogenous or overexpressed levels. (Top  
539 panels) Endogenous Ain1-GFP in a *fim1-1Δ* background. (Middle panels) Ain1-GFP  
540 overexpressed under the 41xnmT promoter in a *fim1-1Δ* background. (Bottom panels)  
541 Ain1-GFP overexpressed under the 41xnmT promoter in a wild-type background  
542 (bottom). Yellow arrowheads indicate cell ends with Ain1-GFP in actin patches. Scale  
543 bar, 5 μm. Time in seconds.

544

545 **Video 2. Overexpressed mutant Ain1(R216E)-GFP, but not Ain1-GFP, localizes to**  
546 **actin patches in the presence of fimbrin, related to Figure 2.** (Top) Fission yeast  
547 cells with Ain1-GFP overexpressed under the 41xnmT promoter (left) and expressing  
548 Fim1-mCherry at the endogenous locus (right). (Bottom) Fission yeast cells with  
549 Ain1(R216E)-GFP overexpressed under the 41xnmT promoter and expressing Fim1-  
550 mCherry at the endogenous locus. Scale bar, 5 μm. Time in seconds.

551

552 **Video 3. α-actinin Ain1 does not displace tropomyosin Cdc8 from F-actin bundles,**  
553 **related to Figure 3.** TIRFM of 1.5 μM actin (Alexa-488 labeled) (left column) with 2.5  
554 μM tropomyosin Cdc8 (TMR- or Cy5-labeled) (middle column) and 500 nM Ain1 (top  
555 row), 500 nM Ain1(R216E) (middle row), or 500 nM Fim1 (bottom row). Scale bar, 5 μm.  
556 Time in sec.

557

558 **Video 4. Tropomyosin Cdc8 enhances α-actinin Ain1-mediated bundling, related**  
559 **to Figure 4.** TIRFM of 1.5 μM actin (Alexa-488 labeled) with varying concentrations of  
560 unlabeled Ain1 and Cdc8. Scale bar, 5 μm. Time in sec.

561

562 **Video 5. Tropomyosin Cdc8 and α-actinin Ain1 work together to prevent fimbrin**  
563 **Fim1 from associating with F-actin bundles, related to Figure 5.** Three-color TIRFM  
564 of 1.5 μM actin (Alexa-488 labeled), 2.5 μM tropomyosin Cdc8 (Cy5-labeled) and 50 nM  
565 fimbrin Fim1 (TMR-labeled) with (bottom) or without (top) 500 nM Ain1 (unlabeled).  
566 Scale bar, 5 μm. Time in sec.

567

568

569 **REFERENCES**

570

571 Burke, T. A., Christensen, J. R., Barone, E., Suarez, C., Sirotkin, V., and Kovar, D. R.  
572 (2014). Homeostatic actin cytoskeleton networks are regulated by assembly factor  
573 competition for monomers. *Curr. Biol.* 24, 579–585.

574 Christensen, J. R., Hocky, G. M., Homa, K. E., Morganthaler, A. N., Hitchcock-DeGregori,  
575 S. E., Voith, G. A., and Kovar, D. R. (2017). Competition between Tropomyosin, Fimbrin,  
576 and ADF/Cofilin drives their sorting to distinct actin filament networks. *eLife* 6, e23152.

577 Cranz-Mileva, S., MacTaggart, B., Russell, J., and Hitchcock-DeGregori, S. E. (2015).  
578 Evolutionarily conserved sites in yeast tropomyosin function in cell polarity, transport and

- 579 contractile ring formation. *Biol. Open* 4, 1040–1051.
- 580 Galkin, V. E., Orlova, A., Cherepanova, O., Lebart, M.-C., and Egelman, E. H. (2008).  
581 High-resolution cryo-EM structure of the F-actin-fimbrin/plastin ABD2 complex. *Proc. Natl.*  
582 *Acad. Sci.* 105, 1494–1498.
- 583 Galkin, V. E., Orlova, A., Salmazo, A., Djinic-Carugo, K., and Egelman, E. H. (2010).  
584 Opening of tandem calponin homology domains regulates their affinity for F-actin. *Nat.*  
585 *Struct. Mol. Biol.* 17, 614–616.
- 586 Holtzman, D. A., Wertman, K. F., and Drubin, D. G. (1994). Mapping actin surfaces  
587 required for functional interactions in vivo. *J. Cell Biol.* 126, 423–432.
- 588 Honts, J. E., Sandrock, T. S., Brower, S. M., O'Dell, J. L., and Adams, A. E. (1994). Actin  
589 mutations that show suppression with fimbrin mutations identify a likely fimbrin-binding  
590 site on actin. *J. Cell Biol.* 126, 413–422.
- 591 Huang, J., Huang, Y., Yu, H., Subramanian, D., Padmanabhan, A., Thadani, R., Tao, Y.,  
592 Tang, X., Wedlich-Soldner, R., and Balasubramanian, M. K. (2012). Nonmedially  
593 assembled F-actin cables incorporate into the actomyosin ring in fission yeast. *J. Cell*  
594 *Biol.* 199, 831–847.
- 595 Laporte, D., Coffman, V. C., Lee, I.-J., and Wu, J.-Q. (2011). Assembly and architecture  
596 of precursor nodes during fission yeast cytokinesis. *J. Cell Biol.* 192, 1005–1021.
- 597 Li, Y., Christensen, J. R., Homa, K. E., Hocky, G. M., Fok, A., Sees, J. A., Voth, G. A.,  
598 and Kovar, D. R. (2016). The F-actin bundler  $\alpha$ -actinin Ain1 is tailored for ring assembly  
599 and constriction during cytokinesis in fission yeast. *Mol. Biol. Cell* 27, 1821–1833.
- 600 McGough, A., Way, M., and DeRosier, D. (1994). Determination of the  $\alpha$ -Actinin-binding  
601 Site on Actin Filaments by Cryoelectron Microscopy and Image Analysis. *J. Cell Biol.* 126,  
602 433–443.
- 603 Miao, Y., Han, X., Zheng, L., Xie, Y., Mu, Y., Yates, J. R., and Drubin, D. G. (2016).  
604 Fimbrin phosphorylation by metaphase Cdk1 regulates actin cable dynamics in budding  
605 yeast. *Nat. Commun.* 7, 11265.
- 606 Nakano, K., Satoh, K., Morimatsu, A., Ohnuma, M., and Mabuchi, I. (2001). Interactions  
607 among a fimbrin, a capping protein, and an actin-depolymerizing factor in organization of  
608 the fission yeast actin cytoskeleton. *Mol. Biol. Cell* 12, 3515–3526.
- 609 Nolen, B. J., Tomasevic, N., Russell, A., Pierce, D. W., Jia, Z., McCormick, C. D.,  
610 Hartman, J., Sakowicz, R., and Pollard, T. D. (2009). Characterization of two classes of  
611 small molecule inhibitors of Arp2/3 complex. *Nature* 460, 1031–1034.
- 612 Sawin, K. E., and Nurse, P. (1998). Regulation of cell polarity by microtubules in fission  
613 yeast. *J. Cell Biol.* 142, 457–471.

- 614 Schindelin, J. *et al.* (2012). Fiji: an open-source platform for biological-image analysis.  
615 *Nature Methods* 9, 676–682.
- 616 Schneider, C. A., Rasband, W. S., and Eliceiri, K. W. (2012). NIH Image to ImageJ: 25  
617 years of image analysis. *Nature Methods* 9, 671–675.
- 618 Sirotkin, V., Berro, J., Macmillan, K., Zhao, L., and Pollard, T. D. (2010). Quantitative  
619 analysis of the mechanism of endocytic actin patch assembly and disassembly in fission  
620 yeast. *Mol. Biol. Cell* 21, 2894–2904.
- 621 Skau, C. T., and Kovar, D. R. (2010). Fimbrin and Tropomyosin Competition Regulates  
622 Endocytosis and Cytokinesis Kinetics in Fission Yeast. *Curr. Biol.* 20, 1415–1422.
- 623 Skau, C. T., Courson, D. S., Bestul, A. J., Winkelman, J. D., Rock, R. S., Sirotkin, V., and  
624 Kovar, D. R. (2011). Actin Filament Bundling by Fimbrin Is Important for Endocytosis,  
625 Cytokinesis, and Polarization in Fission Yeast. *J. Biol. Chem.* 286, 26964–26977.
- 626 Spudich, J. A., and Watt, S. (1971). The regulation of rabbit skeletal muscle contraction.  
627 I. Biochemical studies of the interaction of the tropomyosin-troponin complex with actin  
628 and the proteolytic fragments of myosin. *J. Biol. Chem.* 246, 4866–4871.
- 629 Wu, J. Q., Bahler, J., and Pringle, J. R. (2001). Roles of a fimbrin and an alpha-actinin-  
630 like protein in fission yeast cell polarization and cytokinesis. *Mol. Biol. Cell* 12, 1061–  
631 1077.
- 632 Wu, J.-Q., and Pollard, T. D. (2005). Counting cytokinesis proteins globally and locally in  
633 fission yeast. *Science* 310, 310–314.
- 634 Wu, J.-Q., Kuhn, J. R., Kovar, D. R., and Pollard, T. D. (2003). Spatial and temporal  
635 pathway for assembly and constriction of the contractile ring in fission yeast cytokinesis.  
636 *Dev. Cell* 5, 723–734.
- 637
